# Supplementary material
Source: publisher figshare collection journal article supplement (https://acs.figshare.com/ndownloader/files/4711630)
Supplement: Supplementary file 1 [file 4711630]

# **The Origin of the Surprising Stabilities of Highly Charged Self-assembled Polymetallic Complexes in Solution.**

---

**Gabriel Canard and Claude Piguet\***

**Supporting Information**

(1 page)

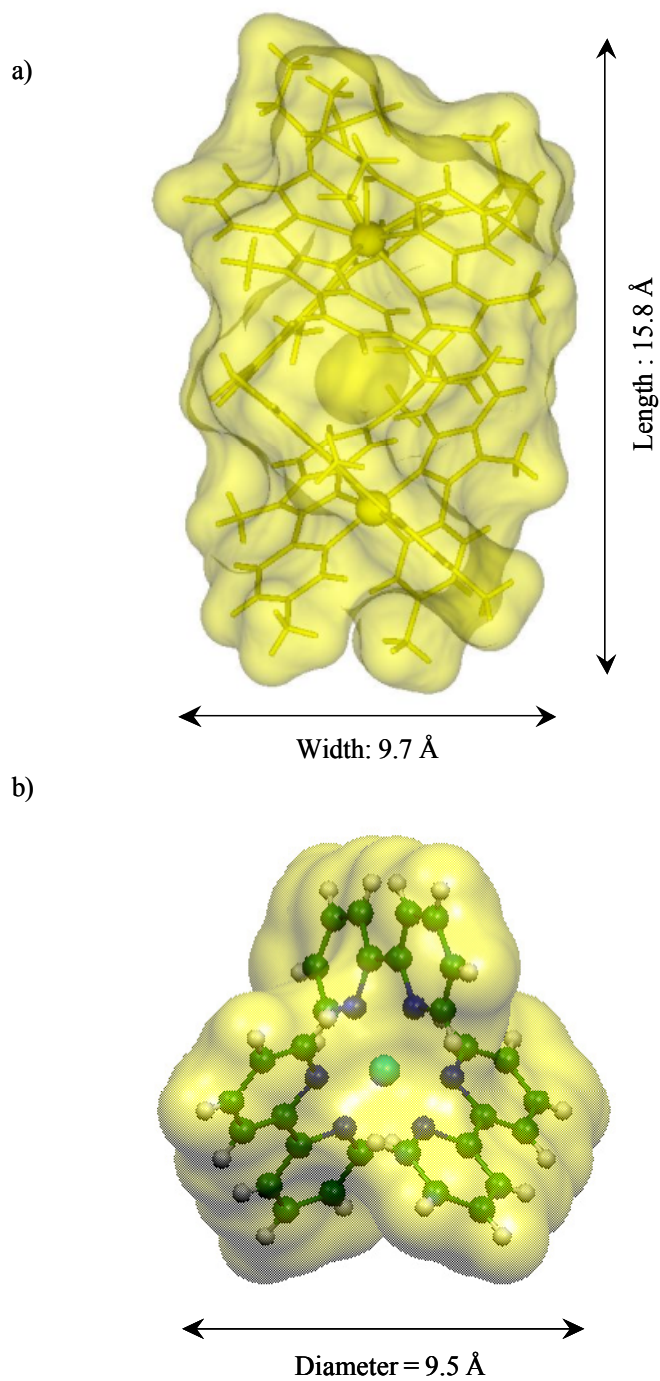

Figure S1 Crystal structures of a)  $[\text{RuLu}(\text{L5})_3]^{5+}$ <sup>11</sup> and b)  $[\text{Ru}(\text{bipy})_3]^{2+}$ <sup>27</sup> with Connolly surfaces.<sup>26</sup>
